# Supplementary material
Source: publisher figshare collection journal article supplement (https://sage.figshare.com/ndownloader/files/24140704)
Supplement: Supplementary file 1 [file 24140704]

Codebook for Leshem & Halperin 2020

-----  
NAT

NATIONALITY PAL=0  
-----

label: NATIONALITY

range: [0,1]

units: 1

unique values: 2

missing .: 0/1,000

| tabulation: | Freq. | Numeric | Label |
|-------------|-------|---------|-------|
|             | 500   | 0       | PAL   |
|             | 500   | 1       | ISR   |

-----  
gen

gender  
-----

label: sex

range: [0,1]

units: 1

unique values: 2

missing .: 0/1,000

| tabulation: | Freq. | Numeric | Label  |
|-------------|-------|---------|--------|
|             | 508   | 0       | male   |
|             | 492   | 1       | female |

-----  
relig

religiosity  
-----

label: religiosity

range: [1,4]

units: 1

unique values: 4

missing .: 0/1,000

| tabulation: | Freq. | Numeric | Label      |
|-------------|-------|---------|------------|
|             | 332   | 1       | secular    |
|             | 292   | 2       | somewhat r |
|             | 285   | 3       | religious  |
|             | 91    | 4       | very r     |

-----  
edu

education  
-----

label: eduHL

range: [1,4]

units: 1

unique values: 4

missing .: 0/1,000

| tabulation: | Freq. | Numeric | Label       |
|-------------|-------|---------|-------------|
|             | 136   | 1       | less the hs |
|             | 292   | 2       | highschool  |
|             | 463   | 3       | b.a.        |
|             | 109   | 4       | m.a. and up |

#### Ethos of Conflict Variables

codebook eoc 1 eoc 2 eoc 4 eoc 5 eoc 6

-----  
eoc\_1

Party has exclusive rights  
-----

type: numeric (byte)

range: [1,5]

units: 1

unique values: 5

missing .: 0/1,000

| tabulation: | Freq. | Value |
|-------------|-------|-------|
|             | 36    | 1     |
|             | 58    | 2     |
|             | 96    | 3     |
|             | 190   | 4     |
|             | 620   | 5     |

-----  
eoc\_2

Party wants peace  
-----

```

      type: numeric (byte)
      range: [1,5]                units: 1
unique values: 5                missing .: 0/1,000
      tabulation: Freq.  Value
                   11  1
                   52  2
                   192  3
                   322  4
                   423  5

```

-----  
eoc\_4

Party suffers violence  
-----

```

      type: numeric (byte)
      range: [1,5]                units: 1
unique values: 5                missing .: 0/1,000
      tabulation: Freq.  Value
                   33  1
                   63  2
                   116  3
                   249  4
                   539  5

```

-----  
eoc\_5

Other does not want peace  
-----

```

      type: numeric (byte)
      range: [1,5]                units: 1
unique values: 5                missing .: 0/1,000
      tabulation: Freq.  Value
                   56  1
                   122  2
                   188  3
                   215  4
                   419  5

```

-----  
eoc\_6

Harming Other is OK  
-----

type: numeric (byte)  
range: [1,5] units: 1  
unique values: 5 missing .: 0/1,000

tabulation: Freq. Value

58 1

110 2

202 3

288 4

342 5

. Ethos of Conflict Scale

alpha eoc\_1 eoc\_2 eoc\_4 eoc\_5 eoc\_6, gen (EOC)

Test scale = mean(unstandardized items)

Average interitem covariance: .3598933

Number of items in the scale: 5

Scale reliability coefficient: 0.6679

### Hope for Peace

#### Variables:

```
. * wishg_3 = wish for "an agreement that ensures the needs of the two peoples"
. * expeg_3 = expect that "an agreement that ensures the needs of the two peoples" will materialize
. * wishg_4 = wish for "an agreement that ensures security and safety for Israelis and independence and freedom for Palestinians."
. * expect_4 = expecting that "an agreement that ensures security and safety for Israelis and independence and freedom for Palestinians." will materialize
```

### Appraisals of the Other's hope

#### Variables

```
* metaw_1 = appraisals of the Other's wish for "an agreement that ensures the needs of the two peoples"
* metaw_2 = appraisals of the Other's wish for "an agreement that ensures security and safety for Israelis and independence and freedom for Palestinians.
* metae_1 = appraisals of the Other's expectations that "an agreement that ensures the needs of the two peoples" will materialize
* metae_2 = appraisals of the Other's expectations that "an agreement that ensures security and safety for Israelis and independence and freedom for Pa
```

### Excluding those who did not know to appraise Others' wishes and expectations:

```
* don't know other's wishes: dkMW=0
* don't know other's expectations: dkME=0
* don't know other's hope (either or both components)

gen dk==.

replace dk=0 if dkMW==0
replace dk=0 if dkME==0
replace dk=1 if dk==.
```

### Support for peacebuilding

#### Variables

```
act_1 = be willing to "join non-violent demonstrations of Palestinians and Israelis calling for peace, justice, and security for all,"
act_2 = be willing to "support a team of Palestinian and Israeli ex-diplomats that are working on drafting a just and sustainable solution to the conflict.",
act_3 = be willing to "share the land for peace"
```

#### Variables

metaWoff = inaccuracy of Other's wishes

metaEoff = inaccuracy of Other's expectations

#### Looking separately at Palestinians' and Israelis' accuracy of appraising each other's expectations

#### Variables

ImetaFerr= Israelis inaccuracy of Palestinians' expectations for peace

PmetaFerr = Palestinians inaccuracy of Israelis expectations for peace

#### Congruency

#### Variables:

##### Wish incongruency

\* gap between wishi and metaW

gen wishi3gap = wishg\_3-metaW\_1

gen wishi4gap = wishg\_4-metaW\_2

alpha wishi3gap wishi4gap, gen (wishigap)

##### Expectations incongruency

\* gap between expei and metaE

gen expei3gap = expeg\_3-metaE\_1

gen expei4gap = expeg\_4-metaE\_2

alpha expei3gap expei4gap, gen (expeigap)
